# Supplementary material for: Spinal Pain, Chronic Health Conditions and Health Behaviors: Data from the 2016–2018 National Health Interview Survey
Source: MDPI journal article supplement (doi:10.3390/ijerph20075369), 2023-04-03
Supplement: s1 [file s1]

Table S1: Data flow chart

| <b>Year</b>                                                                   | <b>Person<br/>Module</b> | <b>Sample Adult<br/>Module</b> | <b>Functioning and Disability<br/>Module</b> | <b>Merged</b> |
|-------------------------------------------------------------------------------|--------------------------|--------------------------------|----------------------------------------------|---------------|
| 2016                                                                          | 97,169                   | 33,028                         | 16,478                                       | 16,478        |
| 2017                                                                          | 78,132                   | 26,742                         | 13,325                                       | 13,325        |
| 2018                                                                          | 72,831                   | 25,417                         | 25,417                                       | 25,417        |
| Total size of the appended study population                                   |                          |                                |                                              | 55,220        |
| Total size of the final study population, excluding cases with missing values |                          |                                |                                              | 26,926        |

Table S2: Distribution of health behaviors, and functional disability, cognitive impairment and mental health conditions by spinal pain status in the US adult population, between 2016-2018

| Health behavior                | General population |             | No spinal pain |             | Neck pain only |             | Low back pain only |             | Spinal pain |             |
|--------------------------------|--------------------|-------------|----------------|-------------|----------------|-------------|--------------------|-------------|-------------|-------------|
|                                | %                  | 95% CI      | %              | 95% CI      | %              | 95% CI      | %                  | 95% CI      | %           | 95% CI      |
| Current smokers                |                    |             |                |             |                |             |                    |             |             |             |
| No                             | 84.9               | (84.4,85.3) | 86.1           | (85.7,86.5) | 84.7           | (83.4,86.0) | 80.7               | (79.9,81.5) | 75.5        | (74.4,76.5) |
| Yes                            | 15.1               | (14.0,15.6) | 13.9           | (13.5,14.3) | 15.3           | (14.0,16.6) | 19.3               | (18.5,20.1) | 24.5        | (23.5,25.6) |
| Leisure-time physical activity |                    |             |                |             |                |             |                    |             |             |             |
| Physically inactive            | 27.6               | (26.7,28.6) | 26.5           | (25.5,27.5) | 24.4           | (22.6,26.1) | 32.2               | (30.9,33.4) | 35.9        | (34.5,37.4) |
| Insufficiently active          | 20.2               | (26.7,28.6) | 19.9           | (19.4,20.4) | 23.0           | (21.4,24.6) | 22.0               | (21.2,22.8) | 22.7        | (21.7,23.6) |
| Sufficiently active            | 52.2               | (26.7,28.6) | 53.6           | (52.7,54.5) | 52.6           | (50.7,54.5) | 45.8               | (44.7,47.0) | 41.4        | (40.1,42.7) |
| Sleep problems                 |                    |             |                |             |                |             |                    |             |             |             |
| No                             | 62.7               | (62.1,63.3) | 66.47          | (65.9,67.1) | 52.8           | (50.9,54.6) | 52.3               | (51.2,53.3) | 34.4        | (33.2,35.6) |
| Yes                            | 37.3               | (36.7,37.9) | 33.53          | (32.9,34.1) | 47.3           | (45.4,49.1) | 47.7               | (46.7,48.8) | 65.6        | (64.4,66.8) |
| Functional disability          |                    |             |                |             |                |             |                    |             |             |             |
| No                             | 77.8               | (77.3,78.4) | 81.6           | (81.1,82.1) | 73.5           | (71.9,75.0) | 66.2               | (65.2,67.2) | 49.7        | (48.4,51.0) |
| Yes                            | 22.2               | (21.6,22.7) | 18.4           | (17.9,18.9) | 26.5           | (25.0,28.1) | 33.8               | (32.8,34.8) | 50.3        | (49.0,51.6) |
| Cognitive impairment           |                    |             |                |             |                |             |                    |             |             |             |
| No                             | 97.6               | (97.4,97.7) | 98.2           | (98.1,98.3) | 97.4           | (96.7,98.1) | 96.9               | (96.6,97.3) | 92.9        | (92.2,93.6) |
| Yes                            | 2.5                | (2.3,2.6)   | 1.8            | (1.7,2.0)   | 2.6            | (1.9,3.4)   | 3.1                | (27,3.4)    | 7.1         | (6.4,7.8)   |
| Depression/anxiety             |                    |             |                |             |                |             |                    |             |             |             |
| No                             | 87.0               | (86.5,87.4) | 89.0           | (81.1,82.1) | 82.9           | (81.2,84.6) | 83.3               | (82.5,84.2) | 71.6        | (70.3,72.9) |
| Yes                            | 13.1               | (12.6,13.5) | 11.0           | (17.9,18.9) | 17.1           | (154,18.8)  | 16.7               | (15.8,17.5) | 28.4        | (27.1,29.8) |

Table S3. Three models for the associations between cardiovascular conditions and spinal pain variables, in the US adult population, 2016-2018

| Chronic health conditions and confounders | No spinal pain | Neck pain only |             |        | Low back pain only |             |        | Spinal pain |             |        |
|-------------------------------------------|----------------|----------------|-------------|--------|--------------------|-------------|--------|-------------|-------------|--------|
|                                           |                | OR             | 95% CI      | P      | OR                 | 95% CI      | P      | OR          | 95% CI      | P      |
| <b>Model 1*</b>                           |                |                |             |        |                    |             |        |             |             |        |
| Cardiovascular conditions                 | Reference      | 1.49           | (1.35,1.64) | <0.001 | 1.58               | (1.34,1.86) | <0.001 | 2.41        | (2.16,2.68) | <0.001 |
| <b>Model 2**</b>                          |                |                |             |        |                    |             |        |             |             |        |
| Cardiovascular conditions                 | Reference      | 1.45           | (1.23,1.72) | <0.001 | 1.33               | (1.21,1.47) | <0.001 | 1.98        | (1.77,2.23) | <0.001 |
| Health behaviors                          |                |                |             |        |                    |             |        |             |             |        |
| Current smokers                           |                | 1.17           | (1.02,1.35) | 0.03   | 1.39               | (1.29,1.50) | <0.001 | 1.54        | (1.4,1.70)  | <0.001 |
| Leisure-time physical activity            |                |                |             |        |                    |             |        |             |             |        |
| Physically inactive                       |                | 0.95           | (0.81,1.11) | 0.501  | 1.15               | (1.06,1.25) | <0.001 | 1.13        | (1.01,1.26) | 0.028  |
| Insufficiently active                     |                | 1.17           | (1.02,1.34) | 0.024  | 1.11               | (1.03,1.2)  | 0.01   | 1.28        | (1.17,1.40) | <0.001 |
| Sufficiently active                       |                | Reference      |             |        | Reference          |             |        | Reference   |             |        |
| Sleep problems                            |                | 1.92           | (1.72,2.15) | <0.001 | 1.87               | (1.76,1.99) | <0.001 | 3.44        | (3.17,3.74) | <0.001 |
| <b>Model 3***</b>                         |                |                |             |        |                    |             |        |             |             |        |
| Cardiovascular conditions                 | Reference      | 1.27           | (1.02,1.58) | 0.03   | 1.15               | (1.00,1.31) | 0.05   | 1.58        | (1.35,1.85) | <0.001 |
| Health behaviors                          |                |                |             |        |                    |             |        |             |             |        |
| Current smokers                           |                | 1.08           | (0.90,1.30) | 0.386  | 1.37               | (1.25,1.51) | <0.001 | 1.46        | (1.28,1.65) | <0.001 |
| Leisure-time physical activity            |                |                |             |        |                    |             |        |             |             |        |
| Physically inactive                       |                | 0.92           | (0.76,1.12) | 0.417  | 1.05               | (0.95,1.17) | 0.32   | 0.94        | (0.82,1.08) | 0.367  |
| Insufficiently active                     |                | 1.10           | (0.92,1.31) | 0.285  | 1.11               | (1.01,1.21) | 0.04   | 1.19        | (1.06,1.33) | 0.002  |
| Sufficiently active                       |                | Reference      |             |        | Reference          |             |        | Reference   |             |        |
| Sleep problems                            |                | 1.81           | (1.58,2.07) | <0.001 | 1.70               | (1.57,1.84) | <0.001 | 2.80        | (2.52,3.12) | <0.001 |
| Functional disability                     |                | 2.01           | (1.62,2.48) | <0.001 | 2.61               | (2.31,2.94) | <0.001 | 4.24        | (3.67,4.89) | <0.001 |
| Cognitive impairment                      |                | 1.45           | (0.77,2.73) | 0.246  | 1.06               | (0.71,1.59) | 0.76   | 1.90        | (1.35,2.67) | <0.001 |
| Anxiety                                   |                | 1.51           | (1.22,1.87) | <0.001 | 1.39               | (1.23,1.58) | <0.001 | 1.76        | (1.53,2.03) | <0.001 |
| Depression                                |                | 1.36           | (1.02,1.82) | 0.039  | 1.24               | (1.02,1.50) | 0.03   | 1.70        | (1.41,2.05) | <0.001 |

\* Model 1 estimates adjusted for demographic factors (age, sex, and race/ethnicity) and socioeconomic factors (education and earnings)

\*\* Model 2 estimates adjusted for demographic and socioeconomic factors and health behaviors (tobacco use, leisure time physical activity, and sleep problems)

\*\*\* Model 3 estimates adjusted for demographic and socioeconomic factors, health behaviors, and functional disability, cognitive impairment, depression, and anxiety

Table S4. Three models for the associations between hypertension and spinal pain variables, in the US adult population, 2016-2018

| Chronic health conditions and confounders | No spinal pain | Neck pain only |             |        | Low back pain only |             |        | Spinal pain |             |        |
|-------------------------------------------|----------------|----------------|-------------|--------|--------------------|-------------|--------|-------------|-------------|--------|
|                                           |                | OR             | 95% CI      | P      | OR                 | 95% CI      | P      | OR          | 95% CI      | P      |
| <b>Model 1*</b>                           |                |                |             |        |                    |             |        |             |             |        |
| Hypertension                              | Reference      | 1.49           | (1.39,1.59) | <0.001 | 1.32               | (1.17,1.49) | <0.001 | 1.73        | (1.59,1.88) | <0.001 |
| <b>Model 2**</b>                          |                |                |             |        |                    |             |        |             |             |        |
| Hypertension                              | Reference      | 1.26           | (1.12,1.43) | <0.001 | 1.40               | (1.3,1.5)   | <0.001 | 1.53        | (1.4,1.66)  | <0.001 |
| Health behaviors                          |                |                |             |        |                    |             |        |             |             |        |
| Current smokers                           |                | 1.18           | (1.03,1.36) | 0.022  | 1.40               | (1.3,1.51)  | <0.001 | 1.56        | (1.41,1.72) | <0.001 |
| Leisure-time physical activity            |                |                |             |        |                    |             |        |             |             |        |
| Physically inactive                       |                | 0.94           | (0.8,1.1)   | 0.43   | 1.13               | (1.04,1.23) | 0.004  | 1.12        | (1.01,1.25) | 0.037  |
| Insufficiently active                     |                | 1.16           | (1.01,1.33) | 0.033  | 1.10               | (1.02,1.18) | 0.016  | 1.26        | (1.15,1.38) | <0.001 |
| Sufficiently active                       |                | Reference      |             |        | Reference          |             |        | Reference   |             |        |
| Sleep problems                            |                | 1.93           | (1.73,2.16) | <0.001 | 1.86               | (1.75,1.98) | <0.001 | 3.47        | (3.2,3.77)  | <0.001 |
| <b>Model 3***</b>                         |                |                |             |        |                    |             |        |             |             |        |
| Hypertension                              | Reference      | 1.23           | (1.05,1.43) | 0.01   | 1.31               | (1.2,1.43)  | <0.001 | 1.40        | (1.25,1.56) | <0.001 |
| Health behaviors                          |                |                |             |        |                    |             |        |             |             |        |
| Current smokers                           |                | 1.09           | (0.91,1.3)  | 0.344  | 1.38               | (1.25,1.51) | <0.001 | 1.46        | (1.29,1.65) | <0.001 |
| Leisure-time physical activity            |                |                |             |        |                    |             |        |             |             |        |
| Physically inactive                       |                | 0.91           | (0.75,1.11) | 0.35   | 1.04               | (0.94,1.15) | 0.455  | 0.93        | (0.81,1.07) | 0.329  |
| Insufficiently active                     |                | 1.09           | (0.91,1.3)  | 0.346  | 1.09               | (0.99,1.2)  | 0.071  | 1.17        | (1.05,1.31) | 0.005  |
| Sufficiently active                       |                | Reference      |             |        | Reference          |             |        | Reference   |             |        |
| Sleep problems                            |                | 1.81           | (1.58,2.07) | <0.001 | 1.69               | (1.57,1.83) | <0.001 | 2.81        | (2.53,3.13) | <0.001 |
| Functional disability                     |                | 2.00           | (1.62,2.48) | <0.001 | 2.54               | (2.26,2.87) | <0.001 | 4.23        | (3.67,4.88) | <0.001 |
| Cognitive impairment                      |                | 1.45           | (0.77,2.74) | 0.249  | 1.06               | (0.71,1.58) | 0.784  | 1.94        | (1.39,2.71) | <0.001 |
| Anxiety                                   |                | 1.51           | (1.22,1.86) | <0.001 | 1.39               | (1.23,1.57) | <0.001 | 1.78        | (1.54,2.05) | <0.001 |
| Depression                                |                | 1.38           | (1.03,1.84) | 0.031  | 1.23               | (1.02,1.49) | 0.03   | 1.71        | (1.42,2.06) | <0.001 |

\* Model 1 estimates adjusted for demographic factors (age, sex, and race/ethnicity) and socioeconomic factors (education and earnings)

\*\* Model 2 estimates adjusted for demographic and socioeconomic factors and health behaviors (tobacco use, leisure time physical activity, and sleep problems)

\*\*\* Model 3 estimates adjusted for demographic and socioeconomic factors, health behaviors, and functional disability, cognitive impairment, depression, and anxiety

Table S5. Three models for the associations between diabetes and spinal pain variables, in the US adult population, 2016-2018

| Chronic health conditions and confounders | No spinal pain | Neck pain only |             |        | Low back pain only |             |        | Spinal pain |             |        |
|-------------------------------------------|----------------|----------------|-------------|--------|--------------------|-------------|--------|-------------|-------------|--------|
|                                           |                | OR             | 95% CI      | P      | OR                 | 95% CI      | P      | OR          | 95% CI      | P      |
| <b>Model 1*</b>                           |                |                |             |        |                    |             |        |             |             |        |
| Diabetes                                  | Reference      | 1.41           | (1.26,1.57) | <0.001 | 1.28               | (1.05,1.56) | 0.013  | 1.60        | (1.40,1.82) | <0.001 |
| <b>Model 2**</b>                          |                |                |             |        |                    |             |        |             |             |        |
| Diabetes                                  | Reference      | 1.25           | (1.03,1.52) | 0.027  | 1.33               | (1.19,1.49) | <0.001 | 1.41        | (1.23,1.62) | <0.001 |
| Health behaviors                          |                |                |             |        |                    |             |        |             |             |        |
| Current smokers                           |                | 1.19           | (1.03,1.37) | 0.021  | 1.40               | (1.3,1.51)  | <0.001 | 1.56        | (1.41,1.72) | <0.001 |
| Leisure-time physical activity            |                |                |             |        |                    |             |        |             |             |        |
| Physically inactive                       |                | 0.93           | (0.79,1.09) | 0.371  | 1.13               | (1.04,1.23) | 0.005  | 1.13        | (1.02,1.27) | 0.023  |
| Insufficiently active                     |                | 1.16           | (1.01,1.33) | 0.04   | 1.11               | (1.03,1.20) | 0.005  | 1.28        | (1.17,1.4)  | <0.001 |
| Sufficiently active                       |                | Reference      |             |        | Reference          |             |        | Reference   |             |        |
| Sleep problems                            |                | 1.96           | (1.75,2.19) | <0.001 | 1.87               | (1.76,1.99) | <0.001 | 3.54        | (3.25,3.84) | <0.001 |
| <b>Model 3***</b>                         |                |                |             |        |                    |             |        |             |             |        |
| Diabetes                                  | Reference      | 1.12           | (0.88,1.44) | 0.353  | 1.20               | (1.05,1.38) | 0.009  | 1.25        | (1.05,1.49) | 0.01   |
| Health behaviors                          |                |                |             |        |                    |             |        |             |             |        |
| Current smokers                           |                | 1.10           | (0.92,1.32) | 0.29   | 1.37               | (1.24,1.51) | <0.001 | 1.45        | (1.28,1.65) | <0.001 |
| Leisure-time physical activity            |                |                |             |        |                    |             |        |             |             |        |
| Physically inactive                       |                | 0.90           | (0.74,1.09) | 0.283  | 1.03               | (0.93,1.15) | 0.537  | 0.95        | (0.82,1.09) | 0.424  |
| Insufficiently active                     |                | 1.08           | (0.9,1.29)  | 0.428  | 1.11               | (1.01,1.22) | 0.029  | 1.20        | (1.08,1.35) | 0.001  |
| Sufficiently active                       |                | Reference      |             |        | Reference          |             |        | Reference   |             |        |
| Sleep problems                            |                | 1.83           | (1.59,2.1)  | <0.001 | 1.69               | (1.56,1.83) | <0.001 | 2.83        | (2.54,3.16) | <0.001 |

|                       |      |             |        |          |             |        |      |             |        |
|-----------------------|------|-------------|--------|----------|-------------|--------|------|-------------|--------|
| Functional disability | 2.15 | (1.75,2.66) | <0.001 | 2.6<br>5 | (2.35,2.99) | <0.001 | 4.29 | (3.70,4.96) | <0.001 |
| Cognitive impairment  | 1.17 | (0.62,2.23) | 0.63   | 1.0<br>3 | (0.69,1.56) | 0.869  | 2.00 | (1.42,2.81) | <0.001 |
| Anxiety               | 1.47 | (1.18,1.82) | <0.001 | 1.4<br>1 | (1.25,1.59) | <0.001 | 1.77 | (1.53,2.05) | <0.001 |
| Depression            | 1.34 | (0.99,1.81) | 0.058  | 1.2<br>3 | (1.02,1.48) | 0.033  | 1.72 | (1.43,2.08) | <0.001 |

\* Model 1 estimates adjusted for demographic factors (age, sex, and race/ethnicity) and socioeconomic factors (education and earnings).

\*\* Model 2 estimates adjusted for demographic and socioeconomic factors and health behaviors (tobacco use, leisure-time physical activity, and sleep problems).

\*\*\* Model 3 estimates adjusted for demographic and socioeconomic factors, health behaviors, and functional disability, cognitive impairment, depression, and anxiety.

Table S6. Three models for the associations between obesity and spinal pain variables, in the US adult population, 2016-2018

| Chronic health conditions and confounders | No spinal pain | Neck pain only |             |        | Low back pain only |             |        | Spinal pain |             |        |
|-------------------------------------------|----------------|----------------|-------------|--------|--------------------|-------------|--------|-------------|-------------|--------|
|                                           |                | OR             | 95% CI      | P      | OR                 | 95% CI      | P      | OR          | 95% CI      | P      |
| <b>Model 1*</b>                           |                |                |             |        |                    |             |        |             |             |        |
| Obesity                                   | Reference      | 0.92           | (0.81,1.03) | 0.15   | 1.44               | (1.36,1.54) | <0.001 | 1.39        | (1.28,1.50) | <0.001 |
| <b>Model 2**</b>                          |                |                |             |        |                    |             |        |             |             |        |
| Obesity                                   | Reference      | 0.89           | (0.79,1.01) | 0.061  | 1.40               | (1.32,1.50) | <0.001 | 1.30        | (1.20,1.40) | <0.001 |
| Health behaviors                          |                |                |             |        |                    |             |        |             |             |        |
| Current smokers                           |                | 1.16           | (1.00,1.35) | 0.043  | 1.43               | (1.33,1.55) | <0.001 | 1.60        | (1.46,1.77) | <0.001 |
| Leisure-time physical activity            |                |                |             |        |                    |             |        |             |             |        |
| Physically inactive                       |                | 0.97           | (0.83,1.14) | 0.717  | 1.11               | (1.02,1.21) | 0.01   | 1.13        | (1.01,1.25) | 0.031  |
| Insufficiently active                     |                | 1.20           | (1.04,1.37) | 0.012  | 1.08               | (1.10,1.60) | 0.06   | 1.27        | (1.16,1.38) | <0.001 |
| Sufficiently active                       |                | Reference      |             |        | Reference          |             |        | Reference   |             |        |
| Sleep problems                            |                | 1.95           | (1.74,2.18) | <0.001 | 1.87               | (1.76,1.98) | <0.001 | 3.52        | (3.24,3.82) | <0.001 |
| <b>Model 3***</b>                         |                |                |             |        |                    |             |        |             |             |        |
| Obesity                                   | Reference      | 0.82           | (0.71,0.96) | 0.011  | 1.34               | (1.25,1.45) | <0.001 | 1.17        | (1.07,1.28) | 0.001  |
| Health behaviors                          |                |                |             |        |                    |             |        |             |             |        |
| Current smokers                           |                | 1.06           | (0.89,1.28) | 0.504  | 1.41               | (1.28,1.55) | <0.001 | 1.50        | (1.32,1.70) | <0.001 |
| Leisure-time physical activity            |                |                |             |        |                    |             |        |             |             |        |
| Physically inactive                       |                | 0.95           | (0.78,1.15) | 0.57   | 1.04               | (0.93,1.15) | 0.502  | 0.95        | (0.82,1.09) | 0.435  |
| Insufficiently active                     |                | 1.13           | (0.95,1.35) | 0.178  | 1.07               | (0.97,1.18) | 0.163  | 1.19        | (1.06,1.33) | 0.003  |
| Sufficiently active                       |                | Reference      |             |        | Reference          |             |        | Reference   |             |        |
| Sleep problems                            |                | 1.82           | (1.58,2.08) | <0.001 | 1.70               | (1.57,1.83) | <0.001 | 2.84        | (2.54,3.16) | <0.001 |
| Functional disability                     |                | 2.14           | (1.73,2.65) | <0.001 | 2.47               | (2.19,2.79) | <0.001 | 4.31        | (3.73,4.98) | <0.001 |
| Cognitive impairment                      |                | 1.46           | (0.77,2.76) | 0.246  | 1.05               | (0.7,1.58)  | 0.804  | 1.99        | (1.43,2.78) | <0.001 |
| Anxiety                                   |                | 1.48           | (1.20,1.84) | <0.001 | 1.40               | (1.24,1.59) | <0.001 | 1.80        | (1.56,2.08) | <0.001 |
| Depression                                |                | 1.42           | (1.06,1.91) | 0.019  | 1.22               | (1.01,1.48) | 0.042  | 1.68        | (1.39,2.03) | <0.001 |

\* Model 1 estimates adjusted for demographic factors (age, sex, and race/ethnicity) and socioeconomic factors (education and earnings)

\*\* Model 2 estimates adjusted for demographic and socioeconomic factors and health behaviors (tobacco use, leisure-time physical activity, and sleep problems)

\*\*\* Model 3 estimates adjusted for demographic and socioeconomic factors, health behaviors, and functional disability, cognitive impairment, depression, and anxiety
